# Supplementary material for: Fluorinated metal–organic frameworks of 1,4-bis(1,2,4-triazol-1-ylmethyl)-2,3,5,6-tetrafluorobenzene: synergistic interactions of ligand isomerism and counteranions
Source: Royal Society of Chemistry journal article supplement (doi:10.1039/c3dt52211c), 2013-09-24
Supplement: c3dt52211c.pdf [file c3dt52211c.pdf]

*Electronic Supplementary Information for Dalton Trans.*

Fluorinated Metal-Organic Frameworks of  
1,4-Bis(1,2,4-triazol-1-ylmethyl)-2,3,5,6-tetrafluorobenzene:  
Synergistic Interactions of  
Ligand Isomerism and Counteranions

Zhi-Hui Zhang,<sup>a,\*</sup> Qing-Qing Zhang,<sup>a</sup> Sheng Feng,<sup>b,\*</sup> Zhao-Jian Hu,<sup>a</sup> Sheng-Chun Chen,<sup>a</sup>  
Qun Chen,<sup>a</sup> and Ming-Yang He<sup>a,\*</sup>

<sup>a</sup> *Key Laboratory of Advanced Catalytic Materials and Technology, Changzhou University,  
Changzhou 213164, P. R. China*

<sup>b</sup> *School of Environmental & Safety Engineering, Changzhou University, Changzhou 213164,  
P. R. China*

\* Corresponding authors. Tel. & Fax: 86-519-86330251, E-mail: zhangzhjpu@gmail.com  
(Z.H.Z.), hemingyangjpu@yahoo.com (M.Y.H.), fengshengczu@126.com (S.F.)

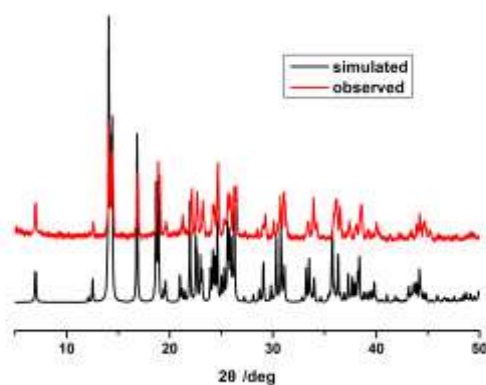

**Fig. S1.** Observed PXRD patterns (black) and simulated PXRD patterns (red) of compound **1**.

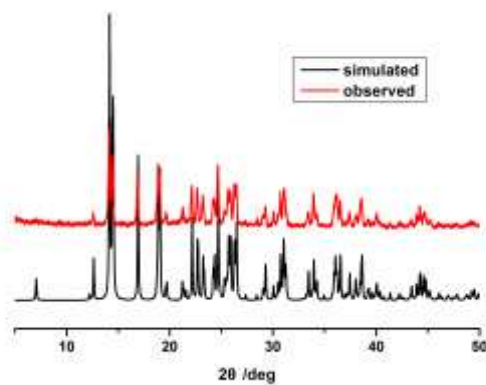

**Fig. S2.** Observed PXRD patterns (black) and simulated PXRD patterns (red) of compound **2**.

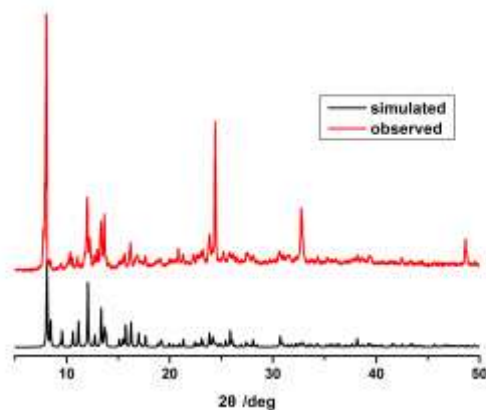

**Fig. S3.** Simulated PXRD patterns (black) and observed PXRD patterns (red) of compound **6**.

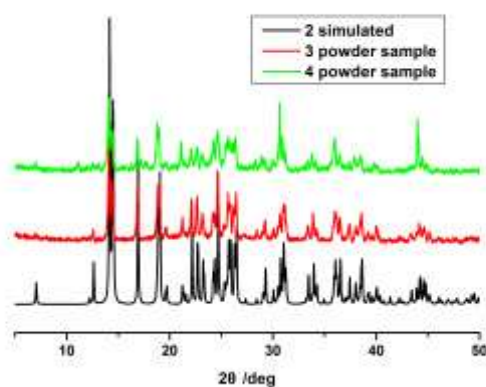

**Fig. S4.** Simulated PXRD patterns (black) of **2** and observed PXRD patterns (red and green) of compounds **3** and **4**.

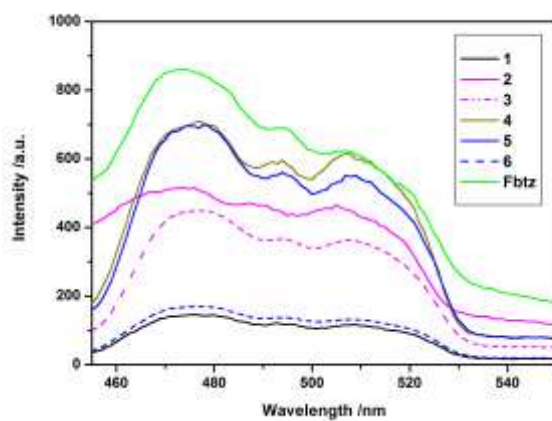

**Fig. S5.** Solid state emission spectra of complexes **1–6** and the free ligand.
